# Supplementary material for: Clinical and Patient-Reported Outcomes of Direct-Acting Antivirals for the Treatment of Chronic Hepatitis C Among Patients on Opioid Agonist Treatment: A Real-world Prospective Cohort Study
Source: PubMed Central journal article supplement — Open Forum Infect Dis. 2020 Aug 13;7(8):ofaa317. doi: 10.1093/ofid/ofaa317 (PMC7452367; doi:10.1093/ofid/ofaa317), 2020-08-13
Supplement: ofaa317_suppl_supplementary_tables.pdf [file ofaa317_suppl_supplementary_tables.pdf]

**Supplementary table S1:** Comparison of previous and current treatment (n = 51-53), means and standard deviations

|                                              | Previous treatment | Current treatment (EoT) | Statistics                |
|----------------------------------------------|--------------------|-------------------------|---------------------------|
| <b>During HCV treatment, ...</b>             |                    |                         |                           |
| I was much bothered by side-effects          | 1.46 (0.96)        | 3.54 (0.87)             | t (51) = -13.00; p < .001 |
| I felt exhausted and weak                    | 1.56 (1.00)        | 3.17 (1.08)             | t (51) = -9.17; p < .001  |
| I was sad all the time and could not stop it | 2.08 (1.12)        | 3.62 (0.84)             | t (52) = -9.37; p < .001  |
| I got done less than I wanted                | 1.69 (1.01)        | 3.25 (1.04)             | t (50) = -7.90; p < .001  |
| I had problems thinking straight             | 2.16 (1.19)        | 3.45 (0.97)             | t (50) = -6.16; p < .001  |

**Notes:** Response options: 1 – yes, 2 – Rather yes, 3 – rather no, 4 – no. In 50 of these 53 patients, previous HCV treatment was interferon-based.

**Supplementary Table S2.** Self-constructed questionnaire on fatigue, concentration and memory (relating to past 7 days)

|    |                                                                                    |
|----|------------------------------------------------------------------------------------|
| 1  | I have problems thinking straight                                                  |
| 2  | I feel exhausted and weak                                                          |
| 3  | I have problems starting things because I am tired                                 |
| 4  | I have problems finishing things because I am tired                                |
| 5  | I am too tired to eat                                                              |
| 6  | I am frustrated, because I am too tired to do things I would like                  |
| 7  | I have problems concentrating                                                      |
| 8  | I have problems remembering where I put things                                     |
| 9  | I have problems memorizing new things                                              |
| 10 | I am forgetting important personal data                                            |
| 11 | I have problems following a conversation with several people                       |
| 12 | When I read a newspaper article or listen to a story, I quickly forget its content |

Note: The exploratory factor analyses supported the division into two subscales: one subscale for fatigue, and one subscale for concentration and memory. The subscale “fatigue” includes the items 2, 3, 4, 5, and 6, with Cronbach’s alpha = .895. The subscale “concentration and memory” includes the items 1, 7, 8, 9, 10, 11, and 12, with Cronbach’s alpha = .895. The total 12-item scale has an internal consistency of .91 (Cronbach’s alpha at  $t_0$ ,  $n = 322$ ). A 3-factor model was not supported. Across all measurement points, internal consistencies of the scales were comparable, and factor analyses supported a 2-factor model.
